# Supplementary material
Source: PubMed Central journal article supplement (PMC9247046)

## Supplementary figure

### Extended Data Fig. 2f

IB: cleaved caspase-1

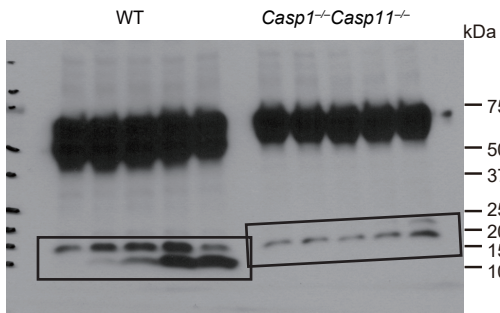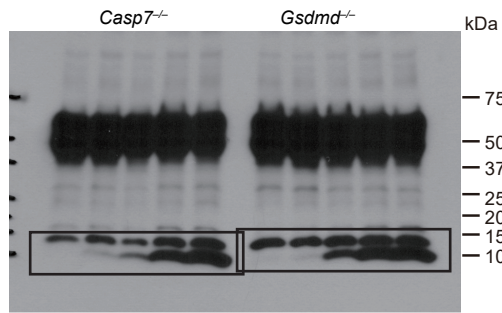

IB: cleaved caspase-7

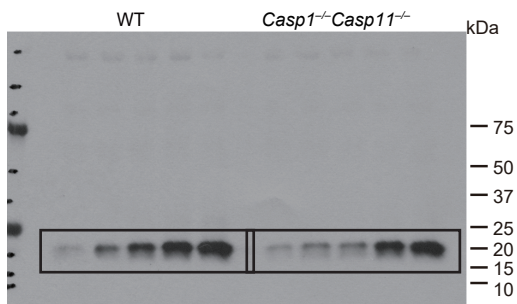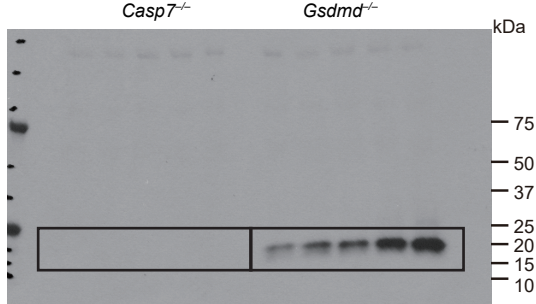

IB: cleaved caspase-8

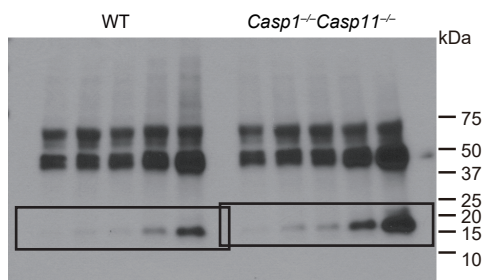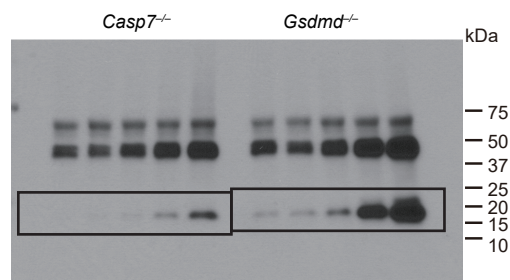

IB: cleaved caspase-9

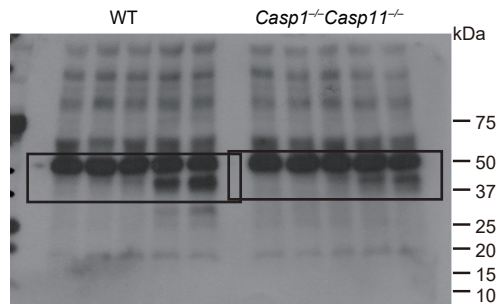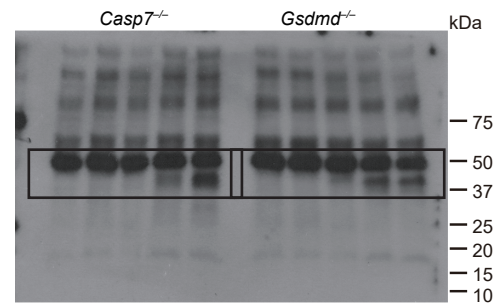

IB: cleaved caspase-3

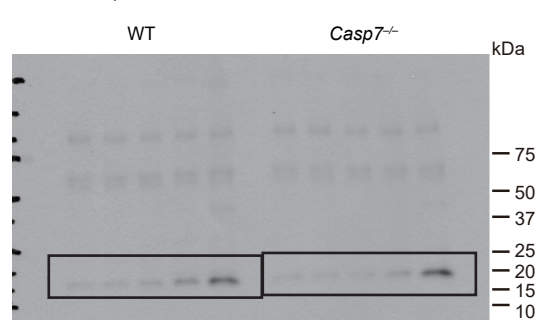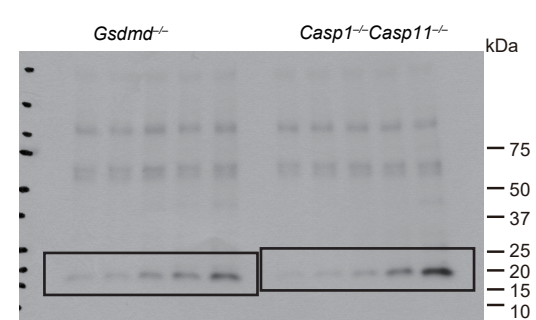

# Supplementary figure

Extended Data Fig.2f

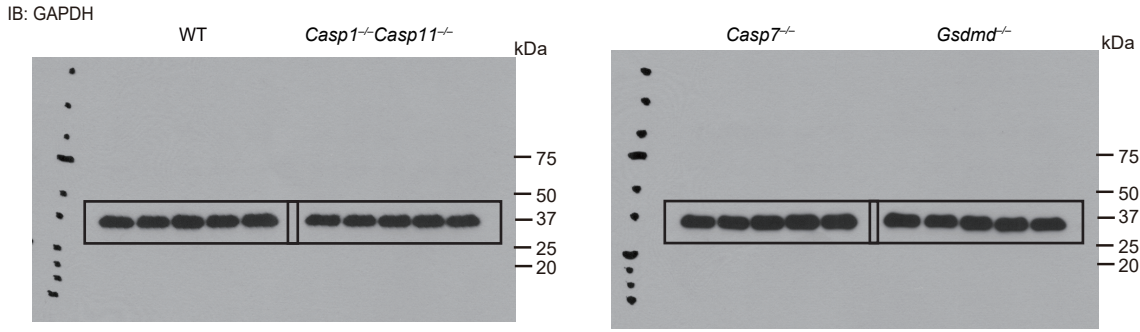

Extended Data Fig. 3a

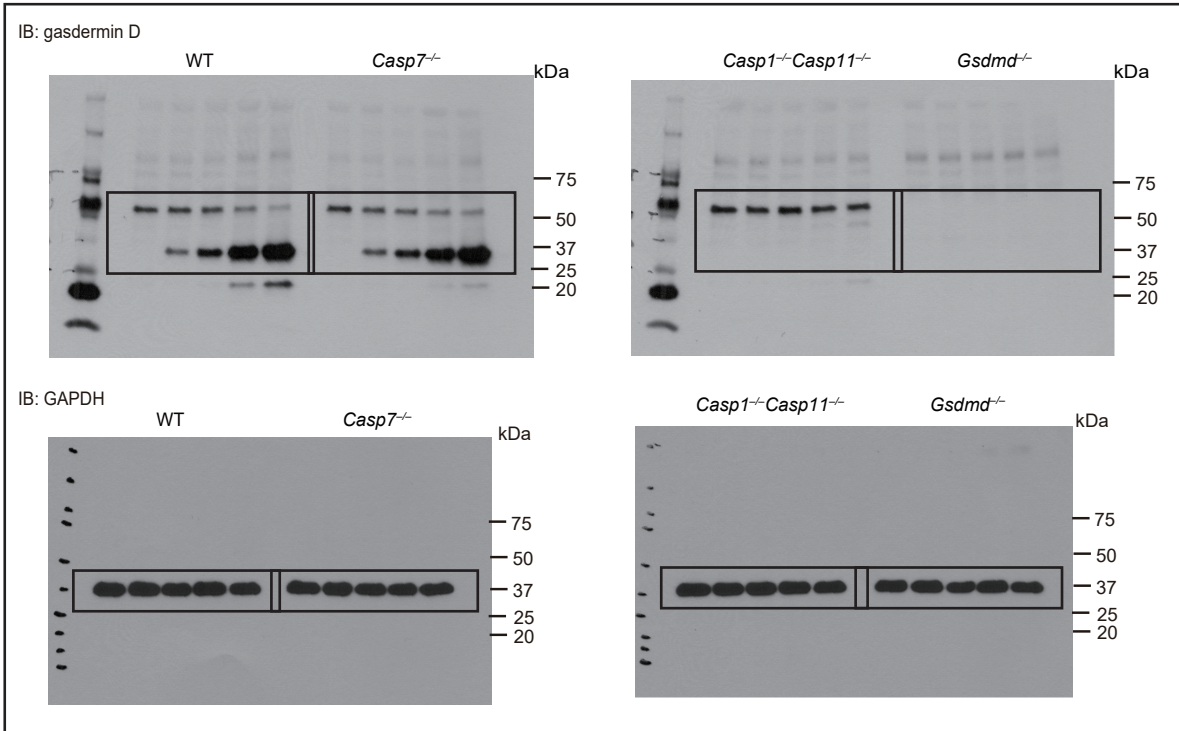

Extended Data Fig. 4a

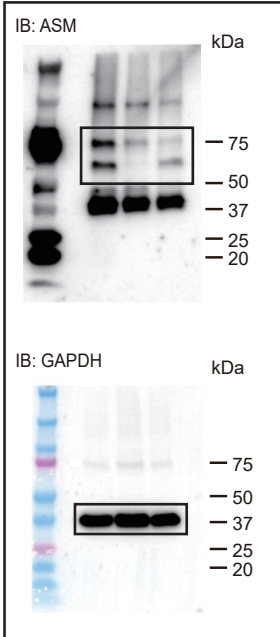

Extended Data Fig. 4b

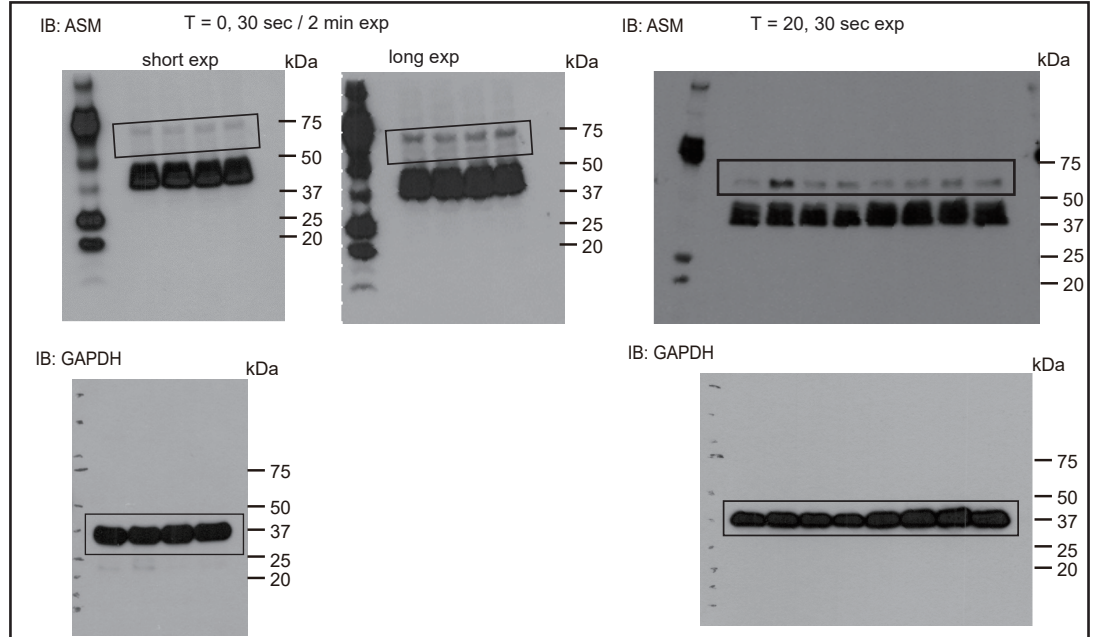

Supplementary figure

Extended Data Fig. 4c

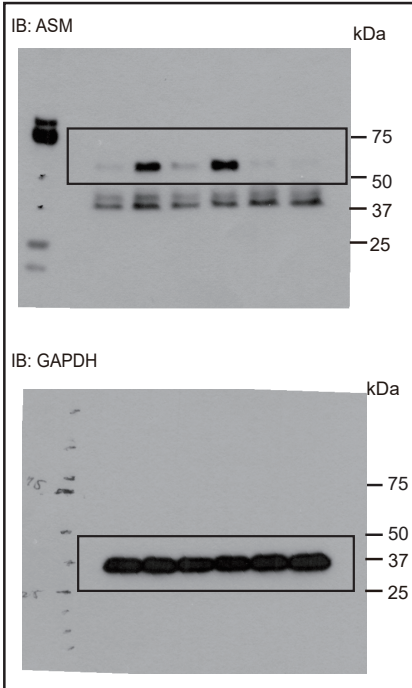

Extended Data Fig. 4d

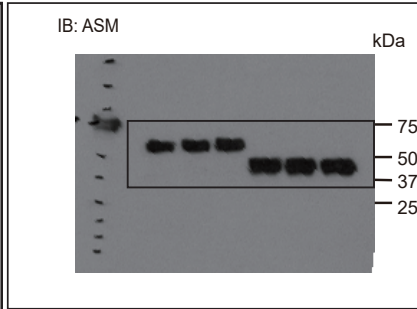

Figure 3e

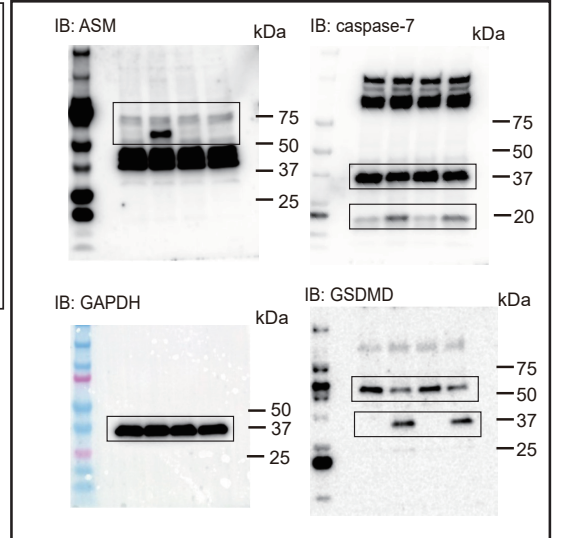

Extended Data Fig. 15a

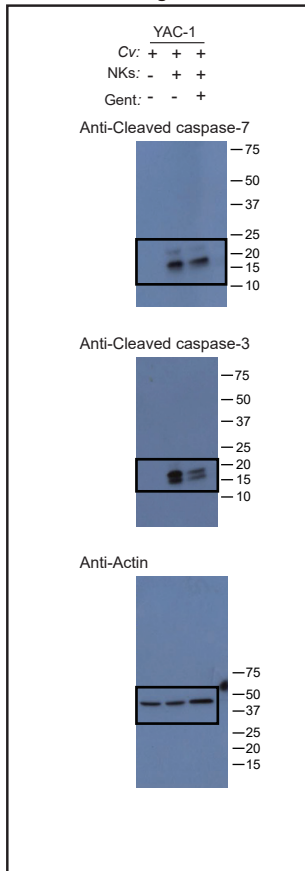

Extended Data Fig. 15c

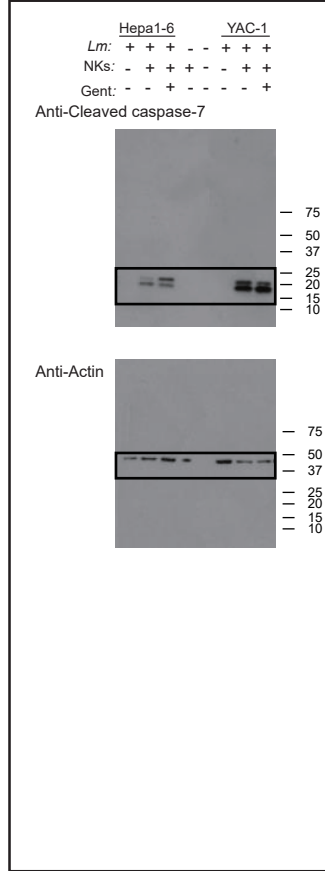

Extended Data Fig. 15e

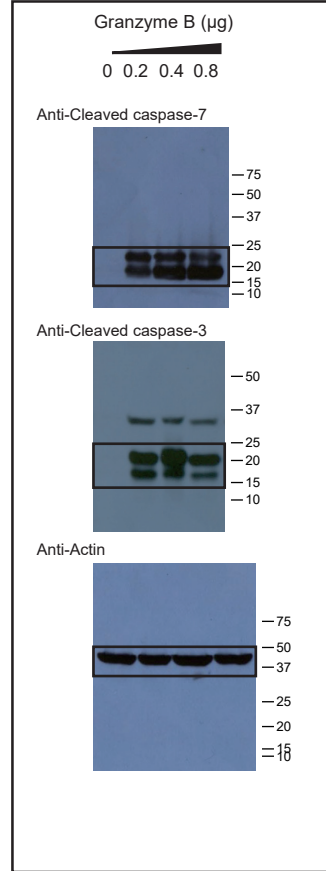

Supplement: NIHMS1811332-supplement-1811332_Supp_Figures.pdf [file NIHMS1811332-supplement-1811332_Supp_Figures.pdf]
